# Supplementary material for: RNA export through the nuclear pore complex is directional
Source: PubMed Central journal article supplement (PMC9537521; doi:10.1038/s41467-022-33572-7), 2022-10-06
Supplement: 41467_2022_33572_MOESM3_ESM.pdf [file 41467_2022_33572_MOESM3_ESM.pdf]

## **Description of Additional Supplementary Files**

File Name: Supplementary Data 1

Description: List of probe sequences used for the detection of RNAs by RNA FISH. Each tab lists the probe set for a specific transcript and the region detected: 5'-end (5); middle (mid); 3'-end (3). If FLAP ends were added to the probes then they are noted as X or Y or Z.
